# Supplementary material
Source: PubMed Central journal article supplement (PMC2148430)

# Muscle fiber area

EDL

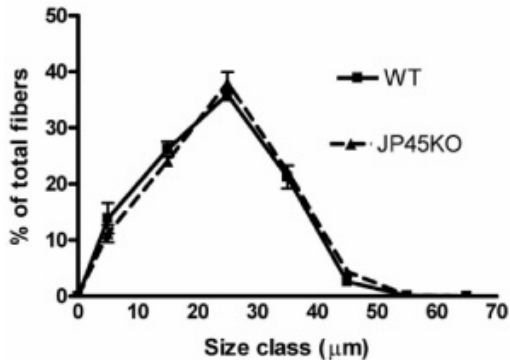

Soleus

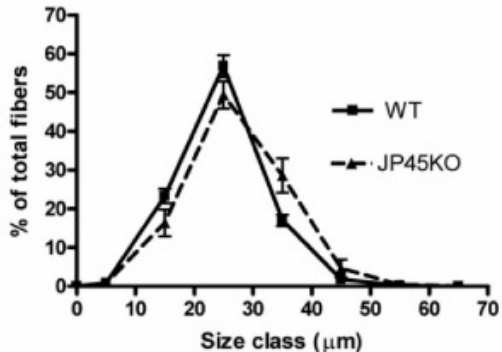

Supplement: pnas_0707389104_1.pdf [file pnas_0707389104_1.pdf]

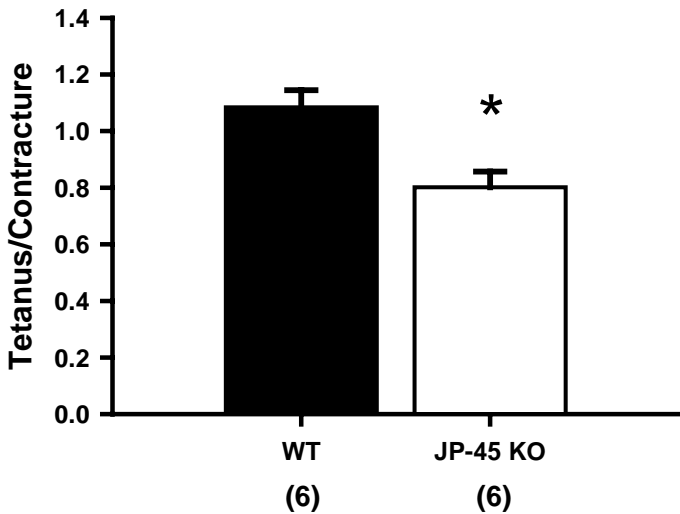

Supplement: pnas_0707389104_2.pdf [file pnas_0707389104_2.pdf]

**WT KO**

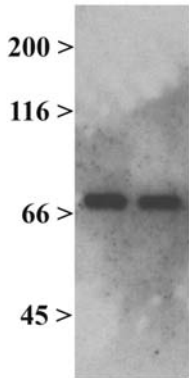

**Albumin band in R1 fraction**

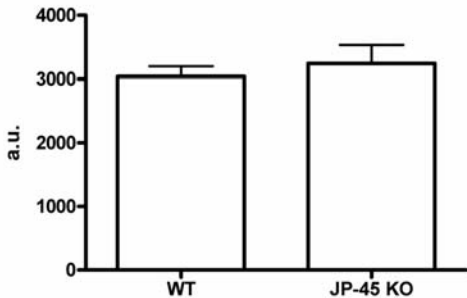

Supplement: pnas_0707389104_3.pdf [file pnas_0707389104_3.pdf]

# LSR ATPase activity

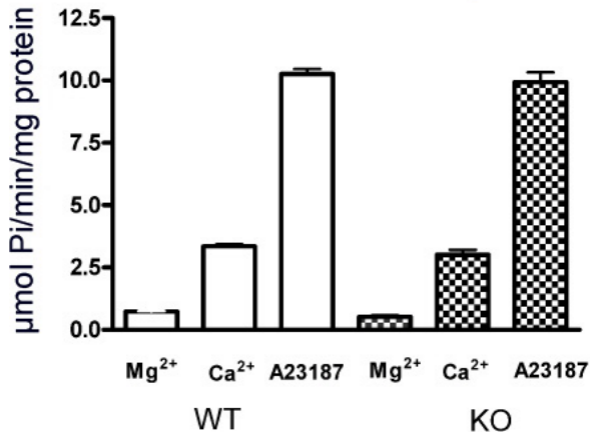

Supplement: pnas_0707389104_4.pdf [file pnas_0707389104_4.pdf]
